# Supplementary material for: Financial inclusion and business practices of microbusiness in Colombia
Source: Springer Nature journal article supplement (doi:10.1007/s40821-022-00231-2), 2023-02-01
Supplement: MOESM1 [file 23982470]

## APPENDIX

## A Variables of the model

Table A1 Description of variables

| Variable                         | Description                                                                                                                       |
|----------------------------------|-----------------------------------------------------------------------------------------------------------------------------------|
| Age                              | Describes the age range in which microentrepreneurs is (18 - 30), (31 - 42), (43 - 58) and (more than 58)                         |
| Education                        | Describes the range of the education level of the microentrepreneurs: primary and others, high school or secondary and university |
| Female                           | One if the microentrepreneurs is a woman and zero otherwise                                                                       |
| Number of Workers                | Besides you, how many people on average have worked at this establishment in the last 12 months or in the months of operation?    |
| Internet use                     | One if firm uses internet or zero if not to carry out your economic activities related to your business                           |
| <b>Financial inclusion index</b> | Where zero corresponds to complete exclusion and one complete inclusion                                                           |
| Separate Account                 | One if there is an exclusive savings account for this business, zero otherwise                                                    |
| Use electronic wallet            | One if the firm has ever used an electronic wallet, zero otherwise                                                                |
| Bank Loan                        | One if a bank loan or credit was requested and accepted with traditional banks (eg BBVA, Bancolombia, etc.), zero otherwise       |
| Family Insurance                 | One if the firm currently has any type of insurance for your family, for you or for your business, zero otherwise                 |
| <b>Formality index</b>           | Where zero corresponds to complete informality and one corresponds to complete formality                                          |
| Operating Permit                 | One if the firm has an operating permit, zero otherwise                                                                           |
| Accounting records               | One if the firm has accounting records, through formal accounting or maintaining personal records, zero otherwise                 |
| Commercial Registry              | One if it has a commercial register or zero otherwise                                                                             |
| Tax registry                     | One if the firm is either register with the tax authority as a firm or as a natural person, zero otherwise                        |
| Insured Workers                  | Proportion of workers with social security benefits                                                                               |

**Table A2** Variables of Business Practices index

|                            |                                                                                                                                                     |
|----------------------------|-----------------------------------------------------------------------------------------------------------------------------------------------------|
| <b>Business Practices</b>  | One corresponds if the microbusiness adopts all business practices and zero if it does not adopt any of them                                        |
| <b>marketing</b>           |                                                                                                                                                     |
| Business practice 1        | One if firm visited a competitor's business to learn their prices, zero otherwise                                                                   |
| Business practice 2        | One if firm visited a competitor's business to see the products offered, zero otherwise                                                             |
| Business practice 3        | One if firm asked his current customers if there was any product or service that they would like to buy or have in his business, zero otherwise     |
| Business practice 4        | One if the business asked a vendor about what products are selling well in the industry or sector, zero otherwise                                   |
| Business practice 5        | One if firm attract customers with special offers, zero otherwise                                                                                   |
| Business practice 6        | One if firm did some kind of marketing, zero otherwise                                                                                              |
| Business practice 7        | One if firm suggested new products or services to his customers, zero otherwise                                                                     |
| Business practice 8        | One if firm has weekly sales goals or objectives or monthly, zero otherwise                                                                         |
| Business practice 9        | One if it uses the internet, books, magazines or newspapers about new trends in the sector, zero otherwise                                          |
| <b>Inventory</b>           |                                                                                                                                                     |
| Business practice 10       | One if it tried to negotiate with a provider for lower prices for your raw materials, zero other                                                    |
| Business practice 11       | One if it compared prices and / or quality offered with alternative suppliers or raw material sources, zero otherwise                               |
| Business practice 12       | One if firm keeps inventories, zero otherwise                                                                                                       |
| Business practice 13       | One if firm keeps inventory records of final products and raw materials, zero otherwise                                                             |
| <b>Sales and Purchases</b> |                                                                                                                                                     |
| Business practice 14       | One if firm records all sales and purchases, zero otherwise                                                                                         |
| Business practice 15       | One if the firm, using his records, knows how much cash it has on hand?, zero otherwise                                                             |
| Business practice 16       | One if it uses product sales information to know if it is growing or decreasing, zero otherwise                                                     |
| Business practice 17       | One if it knows the cost of each product it sells, zero otherwise                                                                                   |
| Business practice 18       | One if it knows what products or services the greater utility or benefit, zero otherwise                                                            |
| Business practice 19       | One if it keeps a written budget that informs it how much does it owe monthly, zero                                                                 |
| Business practice 20       | One if the firm has accounting records that document that the business generates sufficient profits to pay a hypothetical bank loan, zero otherwise |
| Business practice 21       | One if the firm saves payment receipts and/or invoices for his suppliers, zero otherwise                                                            |
| Business practice 22       | One if it gives payment receipts and or invoices to his customers, zero otherwise                                                                   |
| <b>Financial planning</b>  |                                                                                                                                                     |
| Business practice 23       | One if firm reviews his achievements or financial performance of his business, zero                                                                 |
| Business practice 24       | One if firm analyzes the areas or activities of the business that can be improved in their performance, zero                                        |
| Business practice 25       | One if firm keeps balance sheet of your business, zero                                                                                              |
| Business practice 26       | One if firm keeps cash flow statements (record of cash available), zero                                                                             |
| <b>Communications</b>      |                                                                                                                                                     |
| Business practice 27       | One if firm discuss business ideas with other people, zero otherwise                                                                                |
| Business practice 28       | One if it discuss new production techniques with other entrepreneurs, zero otherwise                                                                |
| business practice 29       | One if firm meets with at least one networking communities, zero otherwise                                                                          |
| Business practice 30       | One if firm belongs to an association of entrepreneurs, zero otherwise                                                                              |

**Table A3** Cognitive Variables

| <b>Variable</b>                      | <b>Description</b>                                                                                                                                                                                                                                                                                           |
|--------------------------------------|--------------------------------------------------------------------------------------------------------------------------------------------------------------------------------------------------------------------------------------------------------------------------------------------------------------|
| <b>Reflective, Intuitive</b>         |                                                                                                                                                                                                                                                                                                              |
| Reflective-Intuitive 1               | A hamburger and a soda cost 11,000 (COP). The hamburger costs 10,000 (COP) more than the soda. How much does the soda cost? If the answer is 500 it is reflective if it is 1000 it is intuitive                                                                                                              |
| Reflective-Intuitive 2               | If it takes 5 machines 5 minutes to make 5 screws, how long does it take 100 machines to make 100 screws? If the answer is 100 min it is reflective if it is 10 min intuitive                                                                                                                                |
| Reflective-Intuitive 3               | In a lake there is an area covered with floating flowers. Every day the area covered by the flower's doubles in size. If it takes 64 days for the flowers to cover the entire lake, how long does it take them to cover half the lake? If the answer is 63 days it is reflective if it is 32 it is intuitive |
| <b>Financial mathematical skills</b> |                                                                                                                                                                                                                                                                                                              |
| Mathematical skill 1                 | In a sales rebate, a store or business sells all of its products at half its price. Before the sale, one of their products cost 4,000,000. At how much will you sell it in the sales rebate?                                                                                                                 |
| Mathematical skill 2                 | If you sold two products for 8,000 each and your customer gave you a 20,000 bill, how much money should you give back?                                                                                                                                                                                       |
| Mathematical skill 3                 | Now, assume you have 1,000,000 invested in a business that gives you a 2% profit rate. After 5 years, how much would you have:                                                                                                                                                                               |
| Mathematical skill 4                 | With an annual interest rate of 1% and annual inflation of 2%, how much could you buy the following year?                                                                                                                                                                                                    |
| <b>Perseverance</b>                  |                                                                                                                                                                                                                                                                                                              |
| Perseverance 1                       | Many times, I persisted with work when others gave up                                                                                                                                                                                                                                                        |
| Perseverance 2                       | I keep working on difficult projects even when others object                                                                                                                                                                                                                                                 |
| <b>Personal initiative</b>           |                                                                                                                                                                                                                                                                                                              |
| Personal initiative 1                | I actively face the problems that come my way                                                                                                                                                                                                                                                                |
| Personal initiative 2                | When something goes wrong, I look for a solution immediately                                                                                                                                                                                                                                                 |
| Personal initiative 3                | When an opportunity to get involved in something appears, I take it                                                                                                                                                                                                                                          |
| Personal initiative 4                | I take the initiative immediately even when others don't                                                                                                                                                                                                                                                     |
| Personal initiative 5                | I take advantages of opportunities quickly to achieve my goals                                                                                                                                                                                                                                               |
| Personal initiative 6                | I usually do more than I am asked                                                                                                                                                                                                                                                                            |
| Personal initiative 7                | I am particularly good at noticing opportunities                                                                                                                                                                                                                                                             |

---

## B Summary statistics

**Table B1** Descriptive statistics

|                                      | mean | sd   |
|--------------------------------------|------|------|
| <b>Panel A. Socio-demographic</b>    |      |      |
| Female                               | 0.51 | 0.50 |
| Age 18-30                            | 0.20 | 0.40 |
| Age 31-42                            | 0.31 | 0.46 |
| Age 43-58                            | 0.35 | 0.48 |
| Age more than 58                     | 0.13 | 0.33 |
| Primary                              | 0.24 | 0.43 |
| High School                          | 0.35 | 0.48 |
| College                              | 0.41 | 0.49 |
| Number of workers                    | 1.41 | 2.06 |
| <b>Panel B. Economic activity</b>    |      |      |
| Store                                | 0.19 | 0.39 |
| Prepared food, bars                  | 0.20 | 0.40 |
| Service (hairdressing, health, etc)  | 0.23 | 0.42 |
| Other businesses                     | 0.38 | 0.49 |
| <b>Panel C. Cities</b>               |      |      |
| Bello                                | 0.09 | 0.29 |
| Barranquilla                         | 0.12 | 0.33 |
| Bogota                               | 0.12 | 0.33 |
| Girardot                             | 0.09 | 0.29 |
| Soacha                               | 0.13 | 0.33 |
| Zipaquirá                            | 0.08 | 0.27 |
| Neiva                                | 0.11 | 0.31 |
| Pereira                              | 0.05 | 0.22 |
| Bucaramanga                          | 0.13 | 0.34 |
| Ibague                               | 0.06 | 0.25 |
| <b>Panel D. Cognitive indicators</b> |      |      |
| CRT: Reflective                      | 0.21 | 0.19 |
| CRT: Intuitive                       | 0.61 | 0.21 |
| Financial mathematical skills        | 0.58 | 0.24 |
| Perseverance                         | 0.82 | 0.20 |
| <b>Panel E. Formality beliefs</b>    |      |      |
| Difference beliefs                   | 0.27 | 0.35 |
| Observations                         | 1542 |      |

**Table B2** Comparative Summary Statistics

|                         | (ENET Survey 2019) |      | (DANE Survey 2016) |      | (ANIF Survey 2020) |      |
|-------------------------|--------------------|------|--------------------|------|--------------------|------|
|                         | mean               | sd   | mean               | sd   | mean               | sd   |
| Tax registry            | 0.84               | 0.35 | 0.78               | 0.41 | 0.88               | n.a. |
| Commercial Registry     | 0.76               | 0.43 | 0.73               | 0.45 | 0.74               | n.a. |
| Bank Loan               | 0.17               | 0.38 | 0.21               | 0.41 | 0.27               | n.a. |
| Use electronic wallet   | 0.13               | 0.34 | 0.08               | 0.28 |                    | n.a. |
| Number of workers       | 1.42               | 2.05 | 2.20               | 1.53 |                    | n.a. |
| Number of Workers 1     |                    |      |                    |      | 0.32               | n.a. |
| Workers between 2 and 5 |                    |      |                    |      | 0.57               | n.a. |
| Workers between 2 and 5 |                    |      |                    |      | 0.08               | n.a. |
| Observations            | 1572               |      | 33013              |      | 1500               |      |

Source: ENET study, DANE and ANIF, data of ANIF survey was extracted from the official report

## C Model estimates

### C.1 Detailed result tables

Table C1: SEM regressions coefficient estimates (model with controls)

| Dependent / Regressor                 | Estimate | Std.Err | P-val  |
|---------------------------------------|----------|---------|--------|
| <b>Business Practices (BP)</b>        |          |         |        |
| Personal Initiative (PI)              | 0.06     | 0.01    | <0.001 |
| Female                                | -0.012   | 0.007   | 0.076  |
| High School                           | 0.026    | 0.01    | 0.007  |
| College                               | 0.063    | 0.011   | <0.001 |
| Age 31-42                             | 0.005    | 0.01    | 0.612  |
| Age 43-58                             | -0.018   | 0.01    | 0.056  |
| Age more than 58                      | -0.049   | 0.014   | <0.001 |
| Number of workers                     | 0.011    | 0.002   | <0.001 |
| Owner before                          | 0.002    | 0.011   | 0.835  |
| Risk aversion                         | 0.008    | 0.003   | 0.007  |
| CRT: Reflective                       | 0.083    | 0.022   | <0.001 |
| CRT: Intuitive                        | 0.064    | 0.018   | <0.001 |
| Financial mathematical skills         | 0.061    | 0.017   | <0.001 |
| Perseverance                          | 0.007    | 0.019   | 0.698  |
| Economic activity                     |          |         |        |
| Store (ommitted)                      |          |         |        |
| Prepared food, bars                   | 0.041    | 0.012   | 0.001  |
| Service, hairdressing                 | 0.032    | 0.012   | 0.005  |
| Other business                        | 0.046    | 0.011   | <0.001 |
| Cities                                |          |         |        |
| Bello (ommitted)                      |          |         |        |
| Barranquilla                          | 0.088    | 0.018   | <0.001 |
| Bogota                                | -0.006   | 0.016   | 0.735  |
| Girardot                              | -0.109   | 0.019   | <0.001 |
| Soacha                                | 0.003    | 0.015   | 0.837  |
| Zipaquirá                             | -0.005   | 0.018   | 0.788  |
| Neiva                                 | -0.011   | 0.017   | 0.489  |
| Pereira                               | -0.085   | 0.02    | <0.001 |
| Bucaramanga                           | -0.045   | 0.016   | 0.006  |
| Ibague                                | -0.019   | 0.018   | 0.274  |
| <b>Formality (FO)</b>                 |          |         |        |
| Difference on formality beliefs (DFP) | 0.155    | 0.017   | <0.001 |
| Business Practices (BP)               | 0.071    | 0.179   | 0.69   |
| Female                                | -0.008   | 0.009   | 0.337  |
| High School                           | 0.042    | 0.013   | 0.001  |

*Continued on next page*

Table C1: SEM regressions coefficient estimates (model with controls)

| Dependent / Regressor           | Estimate | Std.Err | P-val  |
|---------------------------------|----------|---------|--------|
| College                         | 0.063    | 0.018   | 0.001  |
| Age 31-42                       | 0.019    | 0.012   | 0.12   |
| Age 43-58                       | 0.02     | 0.013   | 0.109  |
| Age more than 58                | 0.006    | 0.018   | 0.745  |
| Number of workers               | 0.009    | 0.003   | 0.002  |
| Owner before                    | 0.017    | 0.014   | 0.206  |
| Risk aversion                   | 0.008    | 0.004   | 0.03   |
| CRT: Reflective                 | -0.044   | 0.03    | 0.14   |
| CRT: Intuitive                  | -0.016   | 0.025   | 0.533  |
| Financial mathematical skills   | 0.017    | 0.024   | 0.489  |
| Perseverance                    | -0.024   | 0.024   | 0.323  |
| Economic activity               |          |         |        |
| Store (ommitted)                |          |         |        |
| Prepared food, bars             | -0.015   | 0.017   | 0.363  |
| Service, hairdressing           | 0.062    | 0.017   | <0.001 |
| Other business                  | 0.011    | 0.015   | 0.471  |
| Cities                          |          |         |        |
| Bello (ommitted)                |          |         |        |
| Barranquilla                    | 0.053    | 0.027   | 0.046  |
| Bogota                          | 0.058    | 0.021   | 0.007  |
| Girardot                        | 0.126    | 0.03    | <0.001 |
| Soacha                          | 0.087    | 0.021   | <0.001 |
| Zipaquira                       | 0.115    | 0.025   | <0.001 |
| Neiva                           | 0.115    | 0.023   | <0.001 |
| Pereira                         | 0.02     | 0.028   | 0.476  |
| Bucaramanga                     | 0.057    | 0.023   | 0.013  |
| Ibague                          | -0.136   | 0.025   | <0.001 |
| <b>Financial Inclusion (FI)</b> |          |         |        |
| Business practices (BP)         | 1.053    | 0.346   | 0.002  |
| Formality (FO)                  | 0.229    | 0.166   | 0.167  |
| Female                          | -0.013   | 0.016   | 0.422  |
| High School                     | 0.033    | 0.025   | 0.191  |
| College                         | 0.055    | 0.034   | 0.11   |
| Age 31-42                       | 0.008    | 0.022   | 0.729  |
| Age 43-58                       | 0.005    | 0.023   | 0.824  |
| Age more than 58                | 0.062    | 0.034   | 0.071  |
| Number of workers               | 0.011    | 0.006   | 0.053  |
| Owner before                    | -0.01    | 0.026   | 0.705  |
| Risk aversion                   | -0.002   | 0.007   | 0.734  |
| CRT: Reflective                 | -0.097   | 0.055   | 0.08   |
| CRT: Intuitive                  | -0.017   | 0.047   | 0.71   |
| Financial mathematical skills   | -0.038   | 0.045   | 0.401  |
| Perseverance                    | 0.008    | 0.046   | 0.87   |
| Economic activity               |          |         |        |
| Store (ommitted)                |          |         |        |
| Prepared food, bars             | -0.07    | 0.031   | 0.025  |
| Service, hairdressing 3         | -0.026   | 0.029   | 0.376  |
| Other business                  | -0.044   | 0.029   | 0.127  |
| Cities                          |          |         |        |
| Bello (ommitted)                |          |         |        |
| Barranquilla                    | 0.189    | 0.05    | <0.001 |
| Bogota                          | 0.05     | 0.041   | 0.219  |
| Girardot                        | 0.092    | 0.059   | 0.121  |
| Soacha                          | 0.045    | 0.041   | 0.267  |
| Zipaquira                       | -0.026   | 0.048   | 0.585  |
| Neiva                           | 0.007    | 0.046   | 0.881  |
| Pereira                         | 0.145    | 0.052   | 0.006  |
| Bucaramanga                     | 0.072    | 0.044   | 0.104  |
| Ibague                          | 0.128    | 0.049   | 0.01   |
| <b>Variances</b>                |          |         |        |
| Financial Inclusion             | 0.118    | 0.005   | <0.001 |
| Formality                       | 0.088    | 0.004   | <0.001 |
| Business Practices              | 0.157    | 0.006   | <0.001 |
| Personal Initiative             | 0.065    | 0.004   | <0.001 |

*Continued on next page*

Table C1: SEM regressions coefficient estimates (model with controls)

| <b>Dependent / Regressor</b>                  | <b>Estimate</b> | <b>Std.Err</b> | <b>P-val</b> |
|-----------------------------------------------|-----------------|----------------|--------------|
| <b>Covariances</b>                            |                 |                |              |
| Formality $\sim$ Business Practices           | 0.004           | 0.003          | 0.157        |
| Financial Inclusion $\sim$ Formality          | -0.003          | 0.004          | 0.413        |
| Financial Inclusion $\sim$ Business Practices | -0.01           | 0.005          | 0.062        |

*Notes:* Coefficients of the regressions of the structural model which was jointly estimated via maximum likelihood. It was implemented using lavaan for R. The description of each measure is available in appendix. A.

---

## C.2 Ordinary least squares and Two-stage least squares

Our empirical strategy is based on the estimation of a SEM. Yet, an alternative is to estimate the parameters of *BP* and *FO* in the *FI* Equation (1) via two-stage least squares (2SLS). The advantage of this alternative is that it requires weaker assumptions on the distribution of the unobservables. It also allows for a simple comparison with the ordinary least squares (OLS) version that imposes exogeneity of *BP*, *FI*, and *FO*.

In this strategy, the equation for *BP* 2 and a simplified version of the equation for *FO* 3 became the first stage and the equation for *FI* 1 the second stage regression. Equation 3 is simplified by removing *BP* as a regressor, given that our results section has already ruled out this channel. For these regressions, we use the predicted factors after estimating the CFA measurement model.

Table C2 shows the coefficients of the ordinary least squares (OLS) regression (column 1), the first stage regressions for *BP* (column 2) and *FO* (column 3), and the 2SLS regression (column 3). All regressions include the same controls as the main exercises, fixed location (city or municipality), and the economic sector fixed effects. Robust standard errors are shown in parentheses.

In the *BP* first stage (column 2), the *PI* index has a positive and statistically significant effect on *BP*. Similarly for the *FO* equation, *DFB* is also significant. If we explore the Cragg-Donald F-statistics for both equations (notoriously large based on the rule of thumb in Staiger and Stock (1997)), as well as the weak identification test, we can assert the relevance of both instruments.

Once we address the endogeneity issue (present in the OLS regression in column 1), we find that the estimated effect of *BP* is much larger than in the OLS method. Therefore, the OLS model underestimates the effect of *BP* on *FI* due to the reverse causality issue described above. Furthermore, the coefficient of formality is smaller.



**Table C2** Econometric results under OLS and 2SLS

|                                | (1)<br>(OLS)<br>Financial inclusion | (2)<br>(IV 1st stage)<br>Business practices | (3)<br>(IV 1st stage)<br>Formal | (4)<br>(IV 2nd stage)<br>Financial inclusion |
|--------------------------------|-------------------------------------|---------------------------------------------|---------------------------------|----------------------------------------------|
| Business practices             | 0.423***<br>(0.0248)                |                                             |                                 | 1.014***<br>(0.121)                          |
| Formal                         | 0.224***<br>(0.0215)                |                                             |                                 | 0.0684<br>(0.0766)                           |
| Personal initiative            | 0.0421***<br>(0.00713)              | 0.0728***<br>(0.00809)                      | 0.00629<br>(0.00749)            |                                              |
| Difference formal beliefs      | -0.000463<br>(0.0109)               | 0.0440***<br>(0.0113)                       | 0.170***<br>(0.0116)            |                                              |
| Female                         | -0.0209***<br>(0.00588)             | -0.0109*<br>(0.00599)                       | -0.00891<br>(0.00588)           | -0.0158**<br>(0.00681)                       |
| High School                    | 0.0491***<br>(0.00662)              | 0.0236***<br>(0.00875)                      | 0.0432***<br>(0.00863)          | 0.0418***<br>(0.00921)                       |
| College                        | 0.0948***<br>(0.00795)              | 0.0596***<br>(0.00921)                      | 0.0660***<br>(0.00923)          | 0.0698***<br>(0.0121)                        |
| Age 31-42                      | 0.0110<br>(0.00880)                 | 0.00457<br>(0.00799)                        | 0.0190**<br>(0.00852)           | 0.0112<br>(0.00986)                          |
| Age 43-58                      | -0.00641<br>(0.00880)               | -0.0196**<br>(0.00801)                      | 0.0184**<br>(0.00856)           | 0.00805<br>(0.0101)                          |
| Age more than 58               | 0.0310***<br>(0.0110)               | -0.0498***<br>(0.0116)                      | 0.00229<br>(0.0117)             | 0.0608***<br>(0.0139)                        |
| Number of workers              | 0.0183***<br>(0.00186)              | 0.0103***<br>(0.00175)                      | 0.01000***<br>(0.00145)         | 0.0138***<br>(0.00228)                       |
| Owner before                   | -0.00857<br>(0.00925)               | 0.00104<br>(0.00946)                        | 0.0173*<br>(0.00953)            | -0.00650<br>(0.0101)                         |
| Risk aversion                  | 0.00257<br>(0.00238)                | 0.00748***<br>(0.00251)                     | 0.00837***<br>(0.00251)         | -0.000554<br>(0.00279)                       |
| CRT: Reflective                | -0.0443**<br>(0.0176)               | 0.0776***<br>(0.0171)                       | -0.0400**<br>(0.0189)           | -0.0964***<br>(0.0222)                       |
| CRT: Intuitive                 | 0.0225<br>(0.0153)                  | 0.0578***<br>(0.0153)                       | -0.0130<br>(0.0162)             | -0.0137<br>(0.0186)                          |
| Financial mathematical skills  | 0.0000995<br>(0.0138)               | 0.0524***<br>(0.0148)                       | 0.0185<br>(0.0148)              | -0.0280<br>(0.0178)                          |
| Perseverance                   | 0.00843<br>(0.0151)                 | 0.00235<br>(0.0169)                         | -0.0234<br>(0.0165)             | 0.00339<br>(0.0189)                          |
| Constant                       | 0.00330<br>(0.0217)                 | 0.00948<br>(0.0227)                         | 0.00142<br>(0.0238)             | -0.00208<br>(0.0253)                         |
| Observations                   | 1542                                | 1542                                        | 1542                            | 1542                                         |
| Adjusted $R^2$                 | 0.666                               | 0.405                                       | 0.497                           | 0.564                                        |
| F                              | 83.33                               | 50.04                                       | 61.28                           | 58.40                                        |
| F test of excluded instruments |                                     | 52.23                                       | 108.45                          |                                              |
| Underidentification test       |                                     | 91.24                                       | 190.87                          |                                              |
| Weak identification test       |                                     | 89.58                                       | 187.40                          |                                              |

**Notes:** Standard errors in parentheses. OLS and IV regressions which includes fixed effects of municipality. \*  $p < 0.10$ , \*\*  $p < 0.05$ , \*\*\*  $p < 0.01$

## D Measurement model

In our study, we aim to explain the impact of BP on FI, and explore the potential channel of FO. However, these concepts are subject to multiple definitions and indicators. For this reason, we construct factors that summarize multiple measures. There are several alternatives to attain this objective. We explore three methods: (i) simple averages, (ii) principal component analysis, and (iii) confirmatory factor analysis.

The first strategy is to add them up and normalize the sum. This provides equal weights to all the measures and has no underlying assumption on what the resulting index means.

The second strategy, PCA, aims to reduce the dimensionality of a dataset by extracting the common variance between the measures. The principal components are variables that group a set of measures according to their correlation and aim to maintain the total variation of the dataset. As a result, the PCA has no 'theory' behind the meaning of the resulting factors and the researcher chooses an interpretation. The reduction of the dimensionality depends on the degree of correlation of the measures. As discussed in the main text, Tables D1 to D3 present the correlation between measures. These correlations are positive and significant in most cases but are not high. As a result, the PCA exercise suggests retaining more than one factor per area of interest.

The third strategy, CFA, needs stronger assumptions in terms of the meaning of the constructs. A set of dedicated measures reflects the behavior of a latent variable plus measurement error. Typically this set of measures is chosen after a PCA exercise (exploratory factor analysis) which guarantees the high correlation (or internal validity) of the measures. As the PCA suggested the usage of more than one factor per dimension, our resulting factors have low reliability. For our exercise, this is not crucial as we are not aiming to assess the quality of a specific instrument that measures an abstract concept (apart from the case of PI, which we build based on the psychology literature). Nevertheless, in section E we try an alternative formulation of the set of measures, to show that our results are valid under alternative definitions of the concepts.

For our main estimates, we prefer the CFA as it is estimated via maximum likelihood as the SEM equations. Therefore, we can avoid the predicting error resulting from estimating a measurement system and then deriving the factors. Moreover, the resulting factor loadings are not very different among the three alternatives, so just presenting one of them is enough.

**Table D1** Correlation matrix financial inclusion (FI) measures

|                       | Separate Account | Bank Loan | Family Insurance | Use electronic wallet |
|-----------------------|------------------|-----------|------------------|-----------------------|
| Separate Account      | 1.00             |           |                  |                       |
| Bank Loan             | -0.01            | 1.00      |                  |                       |
| Family Insurance      | 0.26***          | 0.07***   | 1.00             |                       |
| Use electronic wallet | 0.30***          | -0.01     | 0.19***          | 1.00                  |

Note: Correlation of each components of formality index.

\*  $p < 0.1$ , \*\*  $p < 0.05$ , \*\*\*  $p < 0.01$

**Table D2** Correlation matrix formality (FO) measures

|                     | Accounting Records | Commercial Registry | Insured Workers | Tax registry | Operating Permit |
|---------------------|--------------------|---------------------|-----------------|--------------|------------------|
| Accounting records  | 1.00               |                     |                 |              |                  |
| Commercial registry | 0.30***            | 1.00                |                 |              |                  |
| Insured workers     | 0.20***            | 0.11***             | 1.00            |              |                  |
| Tax registry        | 0.24***            | 0.63***             | 0.13***         | 1.00         |                  |
| Operating permit    | 0.08***            | 0.34***             | 0.05            | 0.27***      | 1.00             |

Note: Correlation of each components of formality index.

\*  $p < 0.1$ , \*\*  $p < 0.05$ , \*\*\*  $p < 0.01$

**Table D3** Correlation matrix business practices (BP) measures

|      | BP1        | BP2        | BP3        | BP4        | BP5        | BP6        | BP7        | BP8        |
|------|------------|------------|------------|------------|------------|------------|------------|------------|
| BP1  | 1          |            |            |            |            |            |            |            |
| BP2  | 0.7901 *** | 1          |            |            |            |            |            |            |
| BP3  | 0.3335 *** | 0.3614 *** | 1          |            |            |            |            |            |
| BP4  | 0.2902 *** | 0.3321 *** | 0.4175 *** | 1          |            |            |            |            |
| BP5  | 0.2144 *** | 0.2316 *** | 0.2873 *** | 0.2472 *** | 1          |            |            |            |
| BP6  | 0.2089 *** | 0.2154 *** | 0.2276 *** | 0.2017 *** | 0.4603 *** | 1          |            |            |
| BP7  | 0.1942 *** | 0.1979 *** | 0.3360 *** | 0.3204 *** | 0.3286 *** | 0.3441 *** | 1          |            |
| BP8  | 0.1852 *** | 0.2337 *** | 0.2150 *** | 0.2174 *** | 0.2581 *** | 0.2993 *** | 0.2417 *** | 1          |
| BP9  | 0.1926 *** | 0.1914 *** | 0.1989 *** | 0.1734 *** | 0.2640 *** | 0.2861 *** | 0.2108 *** | 0.2319 *** |
| BP10 | 0.1864 *** | 0.1847 *** | 0.2224 *** | 0.3252 *** | 0.2149 *** | 0.1331 *** | 0.2439 *** | 0.1262 *** |
| BP11 | 0.1903 *** | 0.2252 *** | 0.2672 *** | 0.3544 *** | 0.1920 *** | 0.1632 *** | 0.2186 *** | 0.2109 *** |
| BP12 | 0.1603 *** | 0.1697 *** | 0.2043 *** | 0.1823 *** | 0.2743 *** | 0.2818 *** | 0.2264 *** | 0.3773 *** |
| BP13 | 0.1270 *** | 0.1606 *** | 0.1589 *** | 0.1787 *** | 0.2532 *** | 0.2878 *** | 0.1653 *** | 0.3885 *** |
| BP14 | 0.1330 *** | 0.1455 *** | 0.1762 *** | 0.1352 *** | 0.2397 *** | 0.2808 *** | 0.1731 *** | 0.3446 *** |
| BP15 | 0.1555 *** | 0.1744 *** | 0.1896 *** | 0.1703 *** | 0.1944 *** | 0.2555 *** | 0.1470 *** | 0.3717 *** |
| BP16 | 0.1311 *** | 0.1699 *** | 0.2174 *** | 0.2096 *** | 0.2497 *** | 0.2420 *** | 0.1965 *** | 0.3911 *** |
| BP17 | -0.0015    | 0.0353     | 0.0867 *** | 0.1092 *** | 0.048      | 0.0971 *** | 0.1347 *** | 0.1175 *** |
| BP18 | 0.0409     | 0.0507 *** | 0.1458 *** | 0.0933 *** | 0.0593 *** | 0.1311 *** | 0.1806 *** | 0.2075 *** |
| BP19 | 0.1504 *** | 0.2030 *** | 0.2130 *** | 0.1717 *** | 0.2013 *** | 0.2676 *** | 0.2004 *** | 0.3370 *** |
| BP20 | 0.1569 *** | 0.1718 *** | 0.1931 *** | 0.1474 *** | 0.2345 *** | 0.2354 *** | 0.1763 *** | 0.2085 *** |
| BP21 | 0.0692 *** | 0.1004 *** | 0.1221 *** | 0.1740 *** | 0.1475 *** | 0.1561 *** | 0.1195 *** | 0.2294 *** |
| BP22 | 0.1467 *** | 0.1534 *** | 0.1168 *** | 0.0800 *** | 0.1939 *** | 0.2308 *** | 0.1557 *** | 0.1835 *** |
| BP23 | 0.1657 *** | 0.1863 *** | 0.1891 *** | 0.1359 *** | 0.2377 *** | 0.2623 *** | 0.1947 *** | 0.4302 *** |
| BP24 | 0.1340 *** | 0.1887 *** | 0.1869 *** | 0.1839 *** | 0.1989 *** | 0.2521 *** | 0.2444 *** | 0.3946 *** |
| BP25 | 0.1286 *** | 0.1406 *** | 0.1674 *** | 0.1025 *** | 0.2623 *** | 0.2670 *** | 0.1995 *** | 0.3412 *** |
| BP26 | 0.1502 *** | 0.1650 *** | 0.1876 *** | 0.1164 *** | 0.2630 *** | 0.2852 *** | 0.1925 *** | 0.3009 *** |
| BP27 | 0.2755 *** | 0.2770 *** | 0.2868 *** | 0.2409 *** | 0.2448 *** | 0.2598 *** | 0.2186 *** | 0.2436 *** |
| BP28 | 0.2393 *** | 0.2617 *** | 0.2584 *** | 0.2166 *** | 0.2544 *** | 0.2990 *** | 0.2253 *** | 0.2256 *** |
| BP29 | 0.1171 *** | 0.1072 *** | 0.0958 *** | 0.1025 *** | 0.1190 *** | 0.1376 *** | 0.0751 *** | 0.0560 *** |
| BP30 | 0.1504 *** | 0.1311 *** | 0.0675 *** | 0.0634 *** | 0.1039 *** | 0.0663 *** | 0.0974 *** | 0.0493 *** |
|      | BP9        | BP10       | BP11       | BP12       | BP13       | BP14       | BP15       | BP16       |
| BP9  | 1          |            |            |            |            |            |            |            |
| BP10 | 0.2399 *** | 1          |            |            |            |            |            |            |
| BP11 | 0.2051 *** | 0.4893 *** | 1          |            |            |            |            |            |
| BP12 | 0.2545 *** | 0.2384 *** | 0.2572 *** | 1          |            |            |            |            |
| BP13 | 0.2235 *** | 0.1694 *** | 0.2448 *** | 0.6797 *** | 1          |            |            |            |
| BP14 | 0.2416 *** | 0.1134 *** | 0.1575 *** | 0.4937 *** | 0.5175 *** | 1          |            |            |
| BP15 | 0.1988 *** | 0.1215 *** | 0.1901 *** | 0.4884 *** | 0.5007 *** | 0.5493 *** | 1          |            |
| BP16 | 0.2484 *** | 0.1466 *** | 0.2531 *** | 0.4714 *** | 0.4582 *** | 0.4943 *** | 0.5384 *** | 1          |
| BP17 | 0.0197     | 0.0728 *** | 0.1840 *** | 0.1316 *** | 0.1509 *** | 0.1262 *** | 0.1988 *** | 0.2089 *** |
| BP18 | 0.0621 *** | 0.0756 *** | 0.1544 *** | 0.2117 *** | 0.2037 *** | 0.1764 *** | 0.2649 *** | 0.3165 *** |
| BP19 | 0.2763 *** | 0.1305 *** | 0.1868 *** | 0.4084 *** | 0.4328 *** | 0.4318 *** | 0.4295 *** | 0.4505 *** |
| BP20 | 0.2724 *** | 0.1988 *** | 0.1871 *** | 0.3759 *** | 0.4068 *** | 0.3606 *** | 0.3143 *** | 0.3130 *** |
| BP21 | 0.1721 *** | 0.1617 *** | 0.2289 *** | 0.2975 *** | 0.2846 *** | 0.3099 *** | 0.3196 *** | 0.2968 *** |
| BP22 | 0.2810 *** | 0.1029 *** | 0.1295 *** | 0.2398 *** | 0.2556 *** | 0.3167 *** | 0.2534 *** | 0.3008 *** |
| BP23 | 0.2627 *** | 0.1391 *** | 0.2107 *** | 0.4513 *** | 0.4565 *** | 0.4399 *** | 0.4709 *** | 0.5101 *** |
| BP24 | 0.2254 *** | 0.1756 *** | 0.2757 *** | 0.3935 *** | 0.3906 *** | 0.3473 *** | 0.3986 *** | 0.4578 *** |
| BP25 | 0.2132 *** | 0.1102 *** | 0.1647 *** | 0.4746 *** | 0.5257 *** | 0.4751 *** | 0.4218 *** | 0.4561 *** |
| BP26 | 0.2689 *** | 0.1068 *** | 0.1130 *** | 0.4016 *** | 0.4688 *** | 0.4117 *** | 0.3911 *** | 0.3871 *** |
| BP27 | 0.3124 *** | 0.2089 *** | 0.2751 *** | 0.2576 *** | 0.2563 *** | 0.2225 *** | 0.1985 *** | 0.2639 *** |
| BP28 | 0.3422 *** | 0.1626 *** | 0.2150 *** | 0.2674 *** | 0.3001 *** | 0.2619 *** | 0.2054 *** | 0.2658 *** |
| BP29 | 0.2166 *** | 0.0668 *** | 0.0444     | 0.1062 *** | 0.1167 *** | 0.1041 *** | 0.0787 *** | 0.0792 *** |
| BP30 | 0.1880 *** | 0.1119 *** | 0.0376     | 0.1184 *** | 0.1197 *** | 0.0913 *** | 0.0913 *** | 0.0767 *** |
|      | BP17       | BP18       | BP19       | BP20       | BP21       | BP22       | BP23       | BP24       |
| BP17 | 1          |            |            |            |            |            |            |            |
| BP18 | 0.4249 *** | 1          |            |            |            |            |            |            |
| BP19 | 0.1873 *** | 0.2089 *** | 1          |            |            |            |            |            |
| BP20 | 0.0499     | 0.1349 *** | 0.4403 *** | 1          |            |            |            |            |
| BP21 | 0.2595 *** | 0.1650 *** | 0.2359 *** | 0.1771 *** | 1          |            |            |            |
| BP22 | 0.0481     | 0.0576 *** | 0.3099 *** | 0.3460 *** | 0.1626 *** | 1          |            |            |
| BP23 | 0.1215 *** | 0.2060 *** | 0.3802 *** | 0.3654 *** | 0.2626 *** | 0.3371 *** | 1          |            |
| BP24 | 0.1836 *** | 0.2950 *** | 0.3500 *** | 0.3086 *** | 0.2425 *** | 0.2526 *** | 0.5535 *** | 1          |
| BP25 | 0.1513 *** | 0.1655 *** | 0.4401 *** | 0.4432 *** | 0.2359 *** | 0.3598 *** | 0.4996 *** | 0.4087 *** |
| BP26 | 0.0967 *** | 0.1473 *** | 0.4492 *** | 0.5340 *** | 0.2082 *** | 0.3841 *** | 0.4189 *** | 0.3562 *** |
| BP27 | 0.0820 *** | 0.1244 *** | 0.2445 *** | 0.3005 *** | 0.1269 *** | 0.2338 *** | 0.2689 *** | 0.3055 *** |
| BP28 | 0.0501 *** | 0.1041 *** | 0.2964 *** | 0.3484 *** | 0.1218 *** | 0.2777 *** | 0.2847 *** | 0.2667 *** |
| BP29 | -0.0227    | -0.0185    | 0.1397 *** | 0.1682 *** | 0.0322     | 0.1799 *** | 0.1344 *** | 0.0853 *** |
| BP30 | -0.0302    | 0.0073     | 0.1379 *** | 0.1584 *** | 0.0272     | 0.1515 *** | 0.1369 *** | 0.1030 *** |
|      | BP25       | BP26       | BP27       | BP28       | BP29       | BP30       |            |            |
| BP25 | 1          |            |            |            |            |            |            |            |
| BP26 | 0.5919 *** | 1          |            |            |            |            |            |            |
| BP27 | 0.2615 *** | 0.2987 *** | 1          |            |            |            |            |            |
| BP28 | 0.2903 *** | 0.3629 *** | 0.6136 *** | 1          |            |            |            |            |
| BP29 | 0.1303 *** | 0.1731 *** | 0.2560 *** | 0.3267 *** | 1          |            |            |            |
| BP30 | 0.1706 *** | 0.1769 *** | 0.1947 *** | 0.2462 *** | 0.3830 *** | 1          |            |            |

Note: Correlation of each components of formality index.

\*  $p < 0.1$ , \*\*  $p < 0.05$ , \*\*\*  $p < 0.01$

## D.1 Simple averages

Under this alternative, the indices are simple averages of their inputs:

$$Index_i = \frac{1}{J} \sum_{j=1}^J variable_{ij} \quad (4)$$

Where,  $variable_{ij}$  corresponds to the value of variable  $j$  of the  $J$  variables that are part of the particular index, for a given business  $i$ . The value of each index ranges from 0 to 1.

Table D4 presents the main SEM model estimates using the resulting indices. While coefficients are different (as the domain of the indices differs), qualitative results are the same as those presented in Table 2.

Table D4: Main Results using simple averages

|                                                                                                         | (1)<br>No controls             | (2)<br>Controls                |
|---------------------------------------------------------------------------------------------------------|--------------------------------|--------------------------------|
| <b>Panel A. Main estimated coefficients</b>                                                             |                                |                                |
| $\beta_3$ : Personal Initiative $\rightarrow$ Business practices                                        | 0.322***<br>(0.042)            | 0.294***<br>(0.039)            |
| $\beta_5$ : Business practices $\rightarrow$ Formal                                                     | 0.195<br>(0.136)               | 0.171<br>(0.148)               |
| $\beta_4$ : Difference formal beliefs $\rightarrow$ Formal                                              | 0.213***<br>(0.017)            | 0.173***<br>(0.018)            |
| $\beta_2$ : Formal $\rightarrow$ Financial Inclusion                                                    | 0.079<br>(0.071)               | 0.049<br>(0.101)               |
| <b>Panel B. Paths from BP to FI</b>                                                                     |                                |                                |
| $\beta_1 + \beta_2 \cdot \beta_5$ : Business practices $\xrightarrow{\text{Total}}$ Financial Inclusion | 0.516***<br>(0.125)<br>[100%]  | 0.459***<br>(0.146)<br>[100%]  |
| $\beta_1$ : Business practices $\xrightarrow{\text{Direct}}$ Financial Inclusion                        | 0.501***<br>(0.125)<br>[97.1%] | 0.451***<br>(0.148)<br>[98.2%] |
| $\beta_2 \cdot \beta_5$ : Business practices $\rightarrow$ Formal $\rightarrow$ Financial Inclusion     | 0.015<br>(0.017)<br>[2.9%]     | 0.008<br>(0.019)<br>[1.8%]     |
| Observations                                                                                            | 1542                           | 1542                           |
| RMSEA                                                                                                   | 0.143                          | 0.111                          |
| SRMR                                                                                                    | 0.036                          | 0.004                          |
| P-value (Chi-square)                                                                                    | 0.000                          | 0.000                          |
| Comparative Fit Index (CFI)                                                                             | 0.952                          | 0.988                          |
| Tucker-Lewis Index (TLI)                                                                                | 0.571                          | -0.006                         |

*Notes:* The model, is a estimation of the structural equation model via maximum likelihood using Lavaan package for R. The factors were constructed as simple averages of all the relevant measures. Standard errors in parentheses. Percentage of the total effect in brackets, in Panel B. \*  $p < 0.10$ , \*\*  $p < 0.05$ , \*\*\*  $p < 0.01$

## D.2 Principal component analysis

Principal components analysis (PCA), is a multivariate technique introduced by Pearson (1901) used to describe the relationship between several response

variables and to explain the total variation in the data. PCA uses a few equations constructed from the original variables, which are called components. PCA is very useful when the variables under study are highly correlated (positively or negatively) or when the number of independent variables is large.

The first step in this methodology consists in analyzing the correlation matrix for all variables, which shows those correlations are not particularly high (Tables D1 to D3). This indicates that several principal components will be required to account for the variation in the data.

The second step is to execute the PCA and decide the number of factors to retain per concept. Tables D5 to D8 present four eigenvectors (principal components) and the associated eigenvalues and cumulative variance. For FI, these are all the eigenvectors, for FO these four represent 92% of the total variance. However, for BP only 45,8%; we would need 22 factors out of 30 to get 90%, and for PI is 79.4% (6 factors out of 7 to get 90%). If we consider eigenvectors greater than 1 instead (Kaiser's rule), for FI, FO, and PI two would be retained, and more than four for BP.

Rather than generating several factors based on the PCA, in Appendix E we consider each individual measure of FI and FO directly (not aggregating them in an index), and BP in its specific sections.

Finally, as a comparison with the other exercises where only one factor is constructed per concept, Table D9 presents the main results using the first component for each measure. Once again, the magnitude of coefficients is not directly comparable with those in Table 2, but the qualitative results are the same.

**Table D5** Financial Inclusion PCA

|                       | Comp1    | Comp2     | Comp3     | Comp4     |
|-----------------------|----------|-----------|-----------|-----------|
| Separate Account      | .6180278 | -.0952988 | .0113874  | -.7802757 |
| Bank Loan             | .0573795 | .9480146  | .3060013  | -.0658715 |
| Family Insurance      | .548789  | .2208285  | -.7014878 | .3974673  |
| Use electronic wallet | .559982  | -.2083774 | .6435436  | .4783833  |
| Eigenvalue            | 1.5011   | 1.0213    | .7922     | .6853     |
| Cumulative            | 0.3753   | 0.6306    | 0.8287    | 1.0000    |

**Table D6** Formality PCA

|                     | Comp1    | Comp2     | Comp3     | Comp4     |
|---------------------|----------|-----------|-----------|-----------|
| Accounting records  | .3729988 | .47705    | -.4831589 | .6262796  |
| Commercial Registry | .5908192 | -.1663817 | -.1508395 | -.2387093 |
| Insured Workers     | .2190069 | .7399104  | .5905858  | -.2332912 |
| Tax registry        | .5678718 | -.1484322 | -.1564932 | -.4382625 |
| Operating Permit    | .3759816 | -.4186178 | .6087062  | .5516276  |
| Eigenvalue          | 2.0526   | 1.0500    | .8236     | .7150     |
| Cumulative          | 0.4105   | 0.6205    | 0.7853    | 0.9283    |

**Table D7** Business Practices PCA

|            | Comp1    | Comp2     | Comp3     | Comp4     |
|------------|----------|-----------|-----------|-----------|
| BP1        | .1323776 | .3628865  | .0102176  | -.4869251 |
| BP2        | .1453354 | .3572742  | .044645   | -.4799822 |
| BP3        | .1520983 | .2784342  | .1500778  | -.0709173 |
| BP4        | .1392047 | .297759   | .222587   | .0456015  |
| BP5        | .1651439 | .167413   | -.0027428 | .0275488  |
| BP6        | .1757686 | .106371   | -.009732  | .0244929  |
| BP7        | .1495485 | .1942835  | .1393311  | .1551535  |
| BP8        | .1999424 | -.0414327 | .1162962  | -.1282857 |
| BP9        | .1664052 | .1289929  | -.1500544 | .1681628  |
| BP10       | .1241117 | .2251013  | .1747657  | .2919771  |
| BP11       | .1517745 | .1809174  | .2636844  | .2594972  |
| BP12       | .2387304 | -.1438434 | .0394501  | -.0466023 |
| BP13       | .2414022 | -.1843938 | -.0028302 | -.0600831 |
| BP14       | .2264371 | -.1922733 | -.0196934 | -.1165329 |
| BP15       | .2238214 | -.2012311 | .0853191  | -.1445619 |
| BP16       | .2357759 | -.1671212 | .102682   | -.0397397 |
| BP17       | .0887436 | -.0990799 | .3458688  | .222741   |
| BP18       | .1175112 | -.1136569 | .3090727  | .1778896  |
| BP19       | .222573  | -.1170903 | -.0452966 | -.04466   |
| BP20       | .2078919 | -.0599351 | -.1923322 | .0334844  |
| BP21       | .1460039 | -.0988168 | .1976035  | .0774725  |
| BP22       | .1681325 | -.0464082 | -.2235231 | .0082528  |
| BP23       | .2344761 | -.1469014 | -.0142535 | -.0818838 |
| BP24       | .2171722 | -.0926273 | .0970005  | .036607   |
| BP25       | .234351  | -.1917674 | -.1147752 | -.0668448 |
| BP26       | .2280044 | -.1315284 | -.2069802 | -.0433199 |
| BP27       | .1852962 | .2014193  | -.1536709 | .1955486  |
| BP28       | .1923925 | .1692348  | -.2514025 | .1972178  |
| BP29       | .0898277 | .1327797  | -.3747694 | .2295528  |
| BP30       | .086489  | .1119015  | -.3381261 | .1617214  |
| Eigenvalue | 8.1682   | 2.4221    | 1.8416    | 1.3244    |
| Cumulative | 0.2723   | 0.3530    | 0.4144    | 0.4586    |

**Table D8** Personal Initiative PCA

|            | Comp1    | Comp2     | Comp3     | Comp4     |
|------------|----------|-----------|-----------|-----------|
| PI1        | .3457649 | .5778131  | .2560615  | .2808361  |
| PI2        | .3658673 | .5644485  | .1032182  | -.0615997 |
| PI3        | .3989678 | .0146333  | -.43586   | -.4826584 |
| PI4        | .4219895 | -.2140715 | -.0770025 | -.042738  |
| PI5        | .4256914 | -.1884027 | -.2166217 | -.1967557 |
| PI6        | .2976476 | -.3939014 | .805242   | -.2273013 |
| PI7        | .3735372 | -.3329194 | -.1803763 | .7695273  |
| Eigenvalue | 3.1404   | 1.0625    | .7647     | .5951     |
| Cumulative | 0.4486   | 0.6004    | 0.7097    | 0.7947    |

Table D9: Main Results using PCA

|                                                                                                         | (1)<br>No controls             | (2)<br>Controls                |
|---------------------------------------------------------------------------------------------------------|--------------------------------|--------------------------------|
| <b>Panel A. Main estimated coefficients</b>                                                             |                                |                                |
| $\beta_3$ : Personal Initiative $\rightarrow$ Business practices                                        | 0.295***<br>(0.040)            | 0.268***<br>(0.037)            |
| $\beta_5$ : Business practices $\rightarrow$ Formal                                                     | 0.056<br>(0.063)               | 0.050<br>(0.068)               |
| $\beta_4$ : Difference formal beliefs $\rightarrow$ Formal                                              | 1.233***<br>(0.092)            | 1.029***<br>(0.098)            |
| $\beta_2$ : Formal $\rightarrow$ Financial Inclusion                                                    | 0.098<br>(0.067)               | 0.089<br>(0.092)               |
| <b>Panel B. Paths from BP to FI</b>                                                                     |                                |                                |
| $\beta_1 + \beta_2 \cdot \beta_5$ : Business practices $\xrightarrow{\text{Total}}$ Financial Inclusion | 0.226***<br>(0.057)<br>[100%]  | 0.218***<br>(0.067)<br>[100%]  |
| $\beta_1$ : Business practices $\xrightarrow{\text{Direct}}$ Financial Inclusion                        | 0.221***<br>(0.057)<br>[97.8%] | 0.213***<br>(0.068)<br>[97.7%] |
| $\beta_2 \cdot \beta_5$ : Business practices $\rightarrow$ Formal $\rightarrow$ Financial Inclusion     | 0.005<br>(0.007)<br>[2.2%]     | 0.004<br>(0.008)<br>[2.3%]     |
| Observations                                                                                            | 1542                           | 1542                           |
| RMSEA                                                                                                   | 0.149                          | 0.113                          |
| SRMR                                                                                                    | 0.039                          | 0.004                          |
| P-value (Chi-square)                                                                                    | 0.000                          | 0.000                          |
| Comparative Fit Index (CFI)                                                                             | 0.951                          | 0.989                          |
| Tucker-Lewis Index (TLI)                                                                                | 0.560                          | 0.048                          |

*Notes:* The model, is a estimation of the structural equation model via maximum likelihood using Lavaan package for R. The factors correspond to the first principal component of each set of measures. Standard errors in parentheses. Percentage of the total effect in brackets, in Panel B. \*  $p < 0.10$ , \*\*  $p < 0.05$ , \*\*\*  $p < 0.01$



### D.3 Confirmatory Factor Analysis

The standardized version of each of these measures is denoted as  $M_i^{m(j)}$ , and is assumed to be part of a set  $\mathcal{M}^j$  that noisily captures information from a factor  $F_i^j$  where  $j \in \{FO, FI, BP, PI\}$  for microbusiness  $i$ . It is also assumed that the noise  $\phi_i^{m(j)}$ , a classical measurement error<sup>17</sup>, is additively separated from the factor that is loaded into the measure by the parameter  $\varphi^{m(j)}$ . This is presented in Equation 5, where  $v^{m(j)}$  is a measure-specific intercept. Given that the factors are latent variables, identification requires normalization of the location and scale (Anderson and Rubin, 1956; Heckman et al., 2013). One of the factor loadings  $\varphi^{m(j)}$  is set to 1 for each set  $\mathcal{M}^j$  (scale), and the mean of all factors to 0 (location).

$$M_i^{m(j)} = v^{m(j)} + \varphi^{m(j)} F_i^j + \phi_i^{m(j)}, \quad m(j) \in \mathcal{M}^j, \quad j \in \{FO, FI, BP, PI\} \quad (5)$$

The estimates of these parameters are presented in Table D10 below. On top of the factor loadings, intercept, and variance of each measure (see equation 5 above, the table also presents two reliability measures: (i) the Cronbach's alpha, and (ii) the average variance extracted (AVE). For the case of FI and FO, both the alpha and the AVE are low. As discussed above, the correlation among measures is not extremely high, so the internal consistency of the resulting factor is not the highest. For the case of BP and PI, the alpha coefficient is above 0.70, which indicates internal validity. Yet, the AVE for both of them is below 0.50, indicating that less than 50% of the variance of the factors is explained with the observed measures. These findings motivate alternative exercises with fewer measures per factor, just as the PCA approach. This is presented in appendix E.

In the results section of the main text, we predict the factors from the measurement system. Here, Figure D1 presents the densities of the predicted factors. Moreover, Figure D2 shows that *BP* and *FI* correlation is across the entire domain, and follows a linear pattern over most of it.

---

<sup>17</sup> Each of them is assumed to be *iid*, normally distributed with mean 0 and sample variance  $\sigma^{m(j)}$ .

**Fig. D1** Distribution of the predicted factors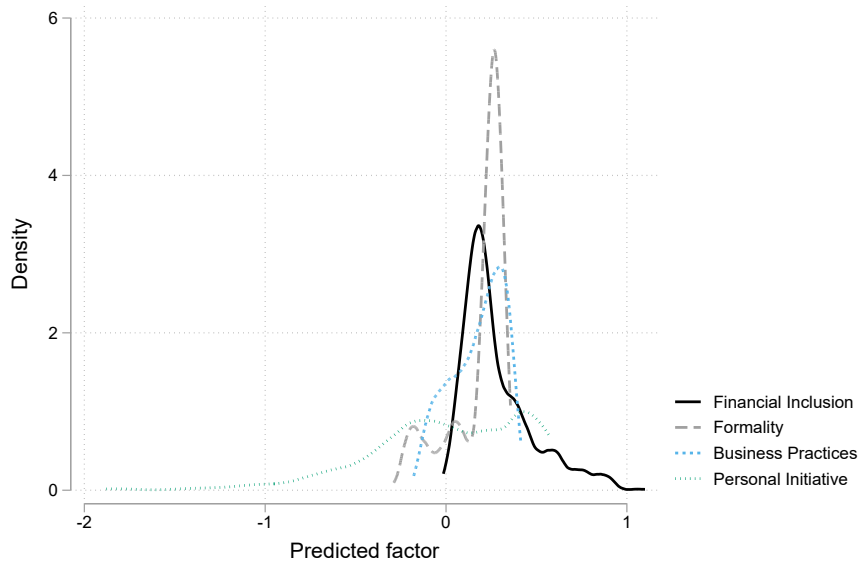**Fig. D2** Non-linear regression BP and FI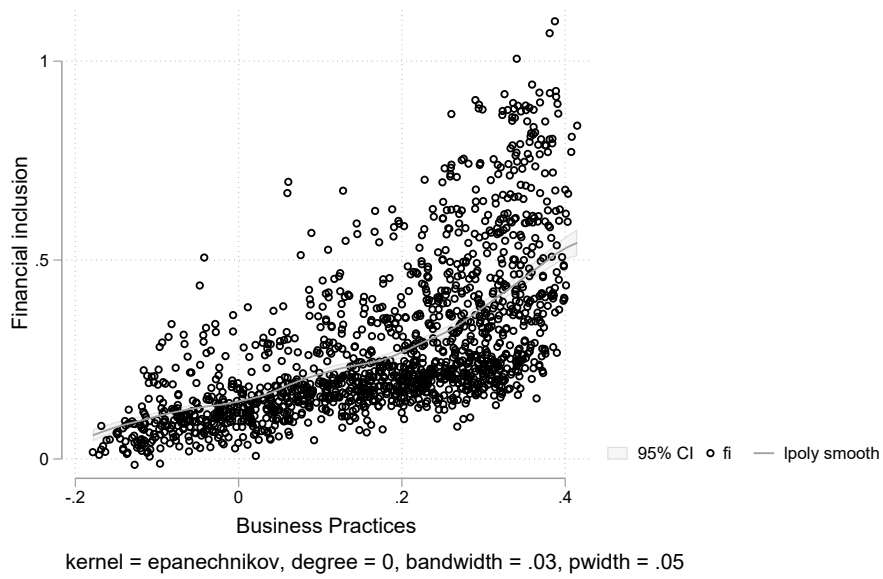

**Table D10** CFA items and estimated coefficients

| Factor / Measure                                 | Mean | Factor coefficient $\phi$ |         |        | Other parameters |            |
|--------------------------------------------------|------|---------------------------|---------|--------|------------------|------------|
|                                                  |      | Estimate                  | Std.Err | P-val  | Intercept        | Error. Var |
| Financial Inclusion (FI), Alpha=0.378, AVE=0.203 |      |                           |         |        |                  |            |
| Separate Account                                 |      | 1                         |         |        | -0.077           | 0.089      |
| Use electronic wallet                            |      | -0.035                    | 0.05    | 0.487  | 0.183            | 0.144      |
| Bank Loan                                        |      | 0.602                     | 0.056   | <0.001 | 0.013            | 0.118      |
| Family Insurance                                 |      | 0.685                     | 0.058   | <0.001 | -0.043           | 0.088      |
| Formality (FO), Alpha=0.588, AVE=0.285           |      |                           |         |        |                  |            |
| Operating Permit                                 |      | 1                         |         |        | 0.563            | 0.157      |
| Accounting records                               |      | 1.931                     | 0.143   | <0.001 | 0.401            | 0.065      |
| Commercial Registry                              |      | 0.515                     | 0.076   | <0.001 | 0.175            | 0.181      |
| Tax registry                                     |      | 1.513                     | 0.113   | <0.001 | 0.566            | 0.057      |
| Insured Workers                                  |      | 1.11                      | 0.108   | <0.001 | 0.336            | 0.21       |
| Business Practices (BP), Alpha=0.904, AVE=0.266  |      |                           |         |        |                  |            |
| BP1: Marketing 1                                 |      | 1                         |         |        | 0.21             | 0.213      |
| BP2: Marketing 2                                 |      | 1.116                     | 0.116   | <0.001 | 0.191            | 0.207      |
| BP3: Marketing 3                                 |      | 1.192                     | 0.124   | <0.001 | 0.318            | 0.216      |
| BP4: Marketing 4                                 |      | 1.04                      | 0.115   | <0.001 | 0.427            | 0.213      |
| BP5: Marketing 5                                 |      | 1.39                      | 0.136   | <0.001 | 0.314            | 0.202      |
| BP6: Marketing 6                                 |      | 1.505                     | 0.142   | <0.001 | 0.326            | 0.19       |
| BP7: Marketing 7                                 |      | 1.116                     | 0.116   | <0.001 | 0.493            | 0.186      |
| BP8: Marketing 8                                 |      | 1.709                     | 0.154   | <0.001 | 0.357            | 0.158      |
| BP9: Marketing 9                                 |      | 1.407                     | 0.136   | <0.001 | 0.159            | 0.194      |
| BP10: Inventory 1                                |      | 0.94                      | 0.111   | <0.001 | 0.417            | 0.223      |
| BP11: Inventory 2                                |      | 1.136                     | 0.118   | <0.001 | 0.475            | 0.19       |
| BP12: Inventory 3                                |      | 2.106                     | 0.181   | <0.001 | 0.294            | 0.121      |
| BP13: Inventory 4                                |      | 2.233                     | 0.191   | <0.001 | 0.204            | 0.125      |
| BP14: Sales and Purchases 1                      |      | 1.949                     | 0.169   | <0.001 | 0.368            | 0.119      |
| BP15: Sales and Purchases 2                      |      | 1.844                     | 0.16    | <0.001 | 0.42             | 0.113      |
| BP16: Sales and Purchases 3                      |      | 1.995                     | 0.172   | <0.001 | 0.359            | 0.115      |
| BP17: Sales and Purchases 4                      |      | 0.376                     | 0.053   | <0.001 | 0.864            | 0.062      |
| BP18: Sales and Purchases 5                      |      | 0.576                     | 0.066   | <0.001 | 0.813            | 0.072      |
| BP19: Sales and Purchases 6                      |      | 1.997                     | 0.174   | <0.001 | 0.246            | 0.148      |
| BP20: Sales and Purchases 7                      |      | 1.868                     | 0.166   | <0.001 | 0.116            | 0.165      |
| BP21: Sales and Purchases 8                      |      | 0.896                     | 0.091   | <0.001 | 0.705            | 0.102      |
| BP22: Sales and Purchases 9                      |      | 1.528                     | 0.145   | <0.001 | 0.199            | 0.194      |
| BP23: Financial planning 1                       |      | 2.091                     | 0.18    | <0.001 | 0.289            | 0.125      |
| BP24: Financial planning 2                       |      | 1.761                     | 0.155   | <0.001 | 0.423            | 0.126      |
| BP25: Financial planning 3                       |      | 2.143                     | 0.184   | <0.001 | 0.245            | 0.129      |
| BP26: Financial planning 4                       |      | 2.111                     | 0.183   | <0.001 | 0.095            | 0.144      |
| BP27: Communications 1                           |      | 1.549                     | 0.144   | <0.001 | 0.145            | 0.186      |
| BP28: Communications 2                           |      | 1.512                     | 0.139   | <0.001 | 0.033            | 0.154      |
| BP29: Communications 3                           |      | 0.417                     | 0.058   | <0.001 | 0.015            | 0.075      |
| BP30: Communications 4                           |      | 0.401                     | 0.058   | <0.001 | 0.019            | 0.077      |
| Personal Initiative (PI), Alpha=0.786, AVE=0.358 |      |                           |         |        |                  |            |
| Personal initiative 1                            |      | 1                         |         |        | 4.332            | 0.697      |
| Personal initiative 2                            |      | 0.949                     | 0.061   | <0.001 | 4.482            | 0.521      |
| Personal initiative 3                            |      | 1.463                     | 0.09    | <0.001 | 3.988            | 0.696      |
| Personal initiative 4                            |      | 1.549                     | 0.093   | <0.001 | 4.06             | 0.562      |
| Personal initiative 5                            |      | 1.497                     | 0.09    | <0.001 | 4.166            | 0.487      |
| Personal initiative 6                            |      | 1.123                     | 0.087   | <0.001 | 3.846            | 1.161      |
| Personal initiative 7                            |      | 1.336                     | 0.087   | <0.001 | 3.977            | 0.731      |

*Notes:* Coefficients of the measurement system (a confirmatory factor analysis) of the structural model which was jointly estimated via maximum likelihood. It was implemented using lavaan for R. *Alpha* corresponds to the 'Cronbach's alpha', and *AVE* to the 'average variance extracted', which are reliability measures obtained by estimating alone the CFA component. The description of each measure is available in appendix A.

**Table E11** Econometric results SEM Model with different measures of FI

|                                                                                                     | (1)<br>Bank Account            | (2)<br>Bank loan             | (3)<br>Family insurance       | (4)<br>Electr wallet       |
|-----------------------------------------------------------------------------------------------------|--------------------------------|------------------------------|-------------------------------|----------------------------|
| <b>Panel A. Main estimated coefficients</b>                                                         |                                |                              |                               |                            |
| $\beta_3$ : Personal Initiative $\rightarrow$ Business practices                                    | 0.060***<br>(0.010)            | 0.060***<br>(0.010)          | 0.060***<br>(0.010)           | 0.060***<br>(0.010)        |
| $\beta_5$ : Business practices $\rightarrow$ Formal                                                 | 0.072<br>(0.179)               | 0.071<br>(0.179)             | 0.071<br>(0.179)              | 0.071<br>(0.178)           |
| $\beta_4$ : Difference formal beliefs $\rightarrow$ Formal                                          | 0.155 ***<br>(0.017)           | 0.155 ***<br>(0.017)         | 0.155 ***<br>(0.017)          | 0.155 ***<br>(0.017)       |
| $\beta_2$ : Formal $\rightarrow$ Financial Inclusion                                                | 0.317<br>(0.199)               | -0.122<br>(0.213)            | -0.191<br>(0.206)             | 0.243<br>(0.181)           |
| <b>Panel B. Paths from BP to FI</b>                                                                 |                                |                              |                               |                            |
| $\beta_1 + \beta_2 \cdot \beta_5$ : Business practices $\xrightarrow{Total}$ Financial Inclusion    | 1.256***<br>(0.407)<br>[100%]  | 0.477<br>(0.416)<br>[100%]   | 0.737*<br>(0.401)<br>[100%]   | 0.419<br>(0.348)<br>[100%] |
| $\beta_1$ : Business practices $\xrightarrow{Direct}$ Financial Inclusion                           | 1.233***<br>(0.411)<br>[98.1%] | 0.486<br>(0.418)<br>[101.8%] | 0.750*<br>(0.406)<br>[101.7%] | 0.402<br>(0.352)<br>[96%]  |
| $\beta_2 \cdot \beta_5$ : Business practices $\rightarrow$ Formal $\rightarrow$ Financial Inclusion | 0.023<br>(0.058)<br>[1.9%]     | -0.009<br>(0.026)<br>[-1.8%] | -0.014<br>(0.037)<br>[-1.7%]  | 0.017<br>(0.045)<br>[4%]   |
| Observations                                                                                        | 1542                           | 1542                         | 1542                          | 1542                       |
| RMSEA                                                                                               | 0.059                          | 0.059                        | 0.059                         | 0.059                      |
| SRMR                                                                                                | 0.062                          | 0.062                        | 0.061                         | 0.061                      |
| P-value (Chi-square)                                                                                | 0.000                          | 0.000                        | 0.000                         | 0.000                      |
| Comparative Fit Index (CFI)                                                                         | 0.596                          | 0.593                        | 0.595                         | 0.596                      |
| Tucker-Lewis Index (TLI)                                                                            | 0.570                          | 0.567                        | 0.568                         | 0.569                      |

Notes: The model is an estimation of the structural equation model jointly with the measurement system via maximum likelihood using Lavaan package for R. Standard errors in parentheses. Percentage of the total effect in brackets, in Panel B. \* (p<0.10), \*\* (p<0.05), \*\*\* (p<0.01)

## E Alternative definition of the items

In this section, we conduct several exercises to determine that our results are maintained when considering different measures of FI, BP, and FO. This follows the results from the measurement system suggesting that more than one factor would be necessary to summarize the total variances of the system.

We ran several additional exercises looking at how results using first, each of the four components of the FI construct and testing how BP affects each component of FI, and second, using four out of the five groups of business practices and testing how each of the BP group affects FI. Results are presented in Table E11) and Table E12). Table E13) presents the effects of BP through the specific formality items.

**Table E12** Econometric results SEM Model with different measures of BP

|                                                                                                         | (1)<br>Marketing               | (2)<br>Inv-Sales               | (3)<br>Fin plan - Communi      | (4)<br>Sales-purch             |
|---------------------------------------------------------------------------------------------------------|--------------------------------|--------------------------------|--------------------------------|--------------------------------|
| <b>Panel A. Main estimated coefficients</b>                                                             |                                |                                |                                |                                |
| $\beta_3$ : Personal Initiative $\rightarrow$ Business practices                                        | 0.107***<br>(0.017)            | 0.097***<br>(0.015)            | 0.072***<br>(0.015)            | 0.083***<br>(0.015)            |
| $\beta_5$ : Business practices $\rightarrow$ Formal                                                     | 0.027<br>(0.093)               | 0.044<br>(0.110)               | 0.049<br>(0.143)               | 0.048<br>(0.127)               |
| $\beta_4$ : Difference formal beliefs $\rightarrow$ Formal                                              | 0.153***<br>(0.017)            | 0.155***<br>(0.017)            | 0.154***<br>(0.017)            | 0.156***<br>(0.017)            |
| $\beta_2$ : Formal $\rightarrow$ Financial Inclusion                                                    | 0.308*<br>(0.168)              | 0.259<br>(0.165)               | 0.251<br>(0.165)               | 0.256<br>(0.165)               |
| <b>Panel B. Paths from BP to FI</b>                                                                     |                                |                                |                                |                                |
| $\beta_1 + \beta_2 \cdot \beta_5$ : Business practices $\xrightarrow{\text{Total}}$ Financial Inclusion | 0.589***<br>(0.193)<br>[100%]  | 0.649***<br>(0.208)<br>[100%]  | 0.890***<br>(0.297)<br>[100%]  | 0.763***<br>(0.248)<br>[100%]  |
| $\beta_1$ : Business practices $\xrightarrow{\text{Direct}}$ Financial Inclusion                        | 0.580***<br>(0.193)<br>[98.5%] | 0.638***<br>(0.210)<br>[98.3%] | 0.878***<br>(0.299)<br>[98.6%] | 0.751***<br>(0.250)<br>[98.4%] |
| $\beta_2 \cdot \beta_5$ : Business practices $\rightarrow$ Formal $\rightarrow$ Financial Inclusion     | 0.008<br>(0.029)<br>[1.5%]     | 0.011<br>(0.029)<br>[1.7%]     | 0.012<br>(0.037)<br>[1.4%]     | 0.012<br>(0.033)<br>[1.6%]     |
| Observations                                                                                            | 1542                           | 1542                           | 1542                           | 1542                           |
| RMSEA                                                                                                   | 0.054                          | 0.057                          | 0.056                          | 0.057                          |
| SRMR                                                                                                    | 0.045                          | 0.046                          | 0.046                          | 0.046                          |
| P-value (Chi-square)                                                                                    | 0.000                          | 0.000                          | 0.000                          | 0.000                          |
| Comparative Fit Index (CFI)                                                                             | 0.704                          | 0.688                          | 0.699                          | 0.688                          |
| Tucker-Lewis Index (TLI)                                                                                | 0.643                          | 0.624                          | 0.636                          | 0.624                          |

Notes: The model, is a estimation of the structural equation model jointly with the measurement system via maximum likelihood using Lavaan package for R. Standard errors in parentheses. Percentage of the total effect in brackets, in Panel B. \* ( $p < 0.10$ ), \*\* ( $p < 0.05$ ), \*\*\* ( $p < 0.01$ )

## F Further heterogeneous effects

Here we explore two alternative sets of heterogeneous effects. We consider the age of the entrepreneur as well as economic activity. Results here are suggestive, as the reduction on sample size

With respect to age, we find that our results hold in almost all cases except in the case of older (age 58+) owners (Table F14, columns 1 to 4). In particular, PI is not statistically significant for BP, and MP does not affect BP. This could be explained by young managers paying more attention to personal discovery, emphasizing self-motivation and self-discipline (Birkinshaw et al., 2019). In contrast, older managers are more reflective thinkers and place greater weight on learning from setbacks and knowing their strengths. However, the smaller sample size for the 58+ group might be also behind this finding.

Finally, on dividing the sample by economic activity (Table F14, columns 5 to 8), most relationships are qualitatively the same. For food, bars, and services the BP to FI paths is still positive but insignificant.

**Table E13** Econometric results SEM Model with different measures of FO

|                                                                                                         | (1)<br>Accounting records       | (2)<br>Comm registry           | (3)<br>Tax registry            | (4)<br>Insured workers         |
|---------------------------------------------------------------------------------------------------------|---------------------------------|--------------------------------|--------------------------------|--------------------------------|
| <b>Panel A. Main estimated coefficients</b>                                                             |                                 |                                |                                |                                |
| $\beta_3$ : Personal Initiative $\rightarrow$ Business practices                                        | 0.060***<br>(0.010)             | 0.060***<br>(0.010)            | 0.060***<br>(0.010)            | 0.060***<br>(0.010)            |
| $\beta_5$ : Business practices $\rightarrow$ Formal                                                     | -0.146<br>(0.403)               | 0.508<br>(0.439)               | 0.069<br>(0.335)               | 0.215<br>(0.478)               |
| $\beta_4$ : Difference formal beliefs $\rightarrow$ Formal                                              | 0.329***<br>(0.032)             | 0.062***<br>(0.035)            | 0.231***<br>(0.027)            | 0.216***<br>(0.039)            |
| $\beta_2$ : Formal $\rightarrow$ Financial Inclusion                                                    | 0.108<br>(0.078)                | 0.591<br>(0.500)               | 0.155<br>(0.112)               | 0.166<br>(0.117)               |
| <b>Panel B. Paths from BP to FI</b>                                                                     |                                 |                                |                                |                                |
| $\beta_1 + \beta_2 \cdot \beta_5$ : Business practices $\xrightarrow{\text{Total}}$ Financial Inclusion | 1.066***<br>(0.343)<br>[100%]   | 1.092***<br>(0.349)<br>[100%]  | 1.064***<br>(0.343)<br>[100%]  | 1.058***<br>(0.342)<br>[100%]  |
| $\beta_1$ : Business practices $\xrightarrow{\text{Direct}}$ Financial Inclusion                        | 1.082***<br>(0.347)<br>[101.5%] | 0.791***<br>(0.484)<br>[72.4%] | 1.053***<br>(0.348)<br>[98.9%] | 1.023***<br>(0.341)<br>[96.7%] |
| $\beta_2 \cdot \beta_5$ : Business practices $\rightarrow$ Formal $\rightarrow$ Financial Inclusion     | -0.016<br>(0.045)<br>[-1.5%]    | 0.300<br>(0.369)<br>[27.6%]    | 0.011<br>(0.052)<br>[1.1%]     | 0.036<br>(0.084)<br>[3.3%]     |
| Observations                                                                                            | 1542                            | 1542                           | 1542                           | 1542                           |
| RMSEA                                                                                                   | 0.057                           | 0.057                          | 0.057                          | 0.057                          |
| SRMR                                                                                                    | 0.054                           | 0.055                          | 0.054                          | 0.055                          |
| P-value (Chi-square)                                                                                    | 0.000                           | 0.000                          | 0.000                          | 0.000                          |
| Comparative Fit Index (CFI)                                                                             | 0.611                           | 0.607                          | 0.610                          | 0.610                          |
| Tucker-Lewis Index (TLI)                                                                                | 0.585                           | 0.580                          | 0.584                          | 0.583                          |

Notes: The model, is a estimation of the structural equation model jointly with the measurement system via maximum likelihood using Lavaan package for R. Standard errors in parentheses. Percentage of the total effect in brackets, in Panel B. \*  $p < 0.10$ , \*\*  $p < 0.05$ , \*\*\*  $p < 0.01$

**Table F14** Heterogeneous effects

|                                                                                                         | (1)<br>(18-30)               | (2)<br>(31-42)                | (3)<br>(43-58)              | (4)<br>(more than 58)        | (5)<br>(Store)                | (6)<br>(Food, bars)         | (7)<br>(Service)            | (8)<br>(Other business)      |
|---------------------------------------------------------------------------------------------------------|------------------------------|-------------------------------|-----------------------------|------------------------------|-------------------------------|-----------------------------|-----------------------------|------------------------------|
| <b>Panel A. Main estimated coefficients</b>                                                             |                              |                               |                             |                              |                               |                             |                             |                              |
| $\beta_3$ : Personal Initiative $\rightarrow$ Business practices                                        | 0.060***<br>(0.022)          | 0.050***<br>(0.019)           | 0.081***<br>(0.021)         | 0.015<br>(0.014)             | 0.049***<br>(0.017)           | 0.119***<br>(0.038)         | 0.022*<br>(0.012)           | 0.075***<br>(0.021)          |
| $\beta_5$ : Business practices $\rightarrow$ Formal                                                     | 0.046<br>(0.401)             | -0.018<br>(0.137)             | 0.074<br>(0.379)            | 1.939<br>(3.915)             | -0.084<br>(0.441)             | -0.023<br>(0.146)           | -1.485<br>(1.331)           | 0.319<br>(0.255)             |
| $\beta_4$ : Difference formal beliefs $\rightarrow$ Formal                                              | 0.055<br>(0.037)             | 0.061***<br>(0.017)           | 0.279***<br>(0.039)         | 0.283***<br>(0.063)          | 0.200***<br>(0.047)           | 0.095***<br>(0.031)         | 0.139***<br>(0.036)         | 0.147***<br>(0.026)          |
| $\beta_2$ : Formal $\rightarrow$ Financial Inclusion                                                    | 1.896<br>(1.616)             | 0.461<br>(0.915)              | -0.015<br>(0.142)           | 0.198<br>(0.140)             | -0.305<br>(0.226)             | 0.003<br>(0.605)            | 0.728<br>(0.429)            | 0.433<br>(0.310)             |
| <b>Panel B. Paths from BP to FI</b>                                                                     |                              |                               |                             |                              |                               |                             |                             |                              |
| $\beta_1 + \beta_2 \cdot \beta_5$ : Business practices $\xrightarrow{\text{Total}}$ Financial Inclusion | 0.987<br>(0.880)<br>[100%]   | 1.97**<br>(0.917)<br>[100%]   | 0.626<br>(0.447)<br>[100%]  | -3.517<br>(4.420)<br>[100%]  | 1.481**<br>(0.721)<br>[100%]  | 0.620<br>(0.387)<br>[100%]  | 0.687<br>(1.541)<br>[100%]  | 1.092**<br>(0.531)<br>[100%] |
| $\beta_1$ : Business practices $\xrightarrow{\text{Direct}}$ Financial Inclusion                        | 0.899<br>(1.009)<br>[104.3%] | 1.982**<br>(0.921)<br>[94.1%] | 0.628<br>(0.448)<br>[94.1%] | -3.900<br>(4.572)<br>[94.1%] | 1.455**<br>(0.716)<br>[94.1%] | 0.620<br>(0.387)<br>[94.1%] | 1.767<br>(1.914)<br>[94.1%] | 0.954*<br>(0.541)<br>[94.1%] |
| $\beta_2 \cdot \beta_5$ : Business practices $\rightarrow$ Formal $\rightarrow$ Financial Inclusion     | 0.088<br>(0.766)<br>[-4.3%]  | -0.008<br>(0.065)<br>[5.8%]   | -0.001<br>(0.012)<br>[5.8%] | 0.383<br>(0.818)<br>[5.8%]   | 0.026<br>(0.135)<br>[5.8%]    | -0.000<br>(0.014)<br>[5.8%] | -1.080<br>(1.150)<br>[5.8%] | 0.138<br>(0.147)<br>[5.8%]   |
| Observations                                                                                            | 317                          | 482                           | 547                         | 196                          | 296                           | 302                         | 356                         | 588                          |
| RMSEA                                                                                                   | 0.058                        | 0.061                         | 0.060                       | 0.070                        | 0.066                         | 0.063                       | 0.061                       | 0.061                        |
| SRMR                                                                                                    | 0.070                        | 0.069                         | 0.066                       | 0.081                        | 0.079                         | 0.076                       | 0.072                       | 0.066                        |
| P-value (Chi-square)                                                                                    | 0.000                        | 0.000                         | 0.000                       | 0.000                        | 0.000                         | 0.000                       | 0.000                       | 0.000                        |
| Comparative Fit Index (CFI)                                                                             | 0.565                        | 0.553                         | 0.603                       | 0.553                        | 0.538                         | 0.516                       | 0.571                       | 0.576                        |
| Tucker-Lewis Index (TLI)                                                                                | 0.538                        | 0.526                         | 0.579                       | 0.526                        | 0.510                         | 0.487                       | 0.544                       | 0.550                        |

Notes: The model, is a estimation of the structural equation model jointly with the measurement system via maximum likelihood using Lavaan package for R. Standard errors in parentheses. Percentage of the total effect in brackets, in Panel B. \*  $p < 0.10$ , \*\*  $p < 0.05$ , \*\*\*  $p < 0.01$
